# Supplementary material for: A Clinical Risk Assessment of a 3D-Printed Patient-Specific Scaffold by Failure Modes and Effects Analysis
Source: Materials (Basel). 2022 Aug 8;15(15):5442. doi: 10.3390/ma15155442 (PMC9369557; doi:10.3390/ma15155442)
Supplement: Supplementary file 1 [file materials-15-05442-s001.zip › materials-1849407-supplementary.pdf]

**Table S1.** Qualitative measurement scale used for the scoring of failure modes in the survey.

|                                                                                                        |                                                            |                                                    |                                                    |                                                                   |
|--------------------------------------------------------------------------------------------------------|------------------------------------------------------------|----------------------------------------------------|----------------------------------------------------|-------------------------------------------------------------------|
| <b>Severity:</b> The magnitude of the consequences arising from the failure.                           |                                                            |                                                    |                                                    |                                                                   |
| Negligible (1)                                                                                         | Minor (2)                                                  | Moderate (3)                                       | Severe (4)                                         | Catastrophic (5)                                                  |
| The failure causes negligible effects.                                                                 | The failure causes slight inconvenience and/or discomfort. | The failure causes temporary injury or impairment. | The failure causes permanent injury or impairment. | The failure causes life-threatening effects or patient death.     |
| <b>Occurrence:</b> The likelihood of the failure occurring.                                            |                                                            |                                                    |                                                    |                                                                   |
| Very low (1)                                                                                           | Low (2)                                                    | Moderate (3)                                       | High (4)                                           | Very high (5)                                                     |
| Failure is extremely unlikely.                                                                         | Failure is unlikely.                                       | Failure is probable.                               | Failure is likely.                                 | Failure is nearly inevitable.                                     |
| <b>Detectability:</b> The chances that the failure mode is detected before adverse consequences occur. |                                                            |                                                    |                                                    |                                                                   |
| Always detected (1)                                                                                    | Likely detectable (2)                                      | Somewhat detectable (3)                            | Unlikely detection (4)                             | Undetectable (5)                                                  |
| Detection of the failure mode is almost certain.                                                       | Detection of the failure mode is likely.                   | Detection of the failure mode is somewhat likely.  | Detection of the failure mode is unlikely.         | Detection of the failure mode is nearly or completely impossible. |

**Table S2.** Frequency and percentages of self-rated confidence by level of experience.

|                               | Level of confidence |                  |                      | P-value |
|-------------------------------|---------------------|------------------|----------------------|---------|
|                               | Confident<br>n (%)  | Neutral<br>n (%) | Unconfident<br>n (%) |         |
| Level of experience           |                     |                  |                      |         |
| <i>Surgical experience</i>    | 4 (29)              | 8 (57)           | 2 (14)               | 0.857   |
| <i>No surgical experience</i> | 9 (33)              | 13 (48)          | 5 (19)               |         |
